# Supplementary material for: Thyrotropin receptor-associated diseases: from adenomata to Graves disease
Source: JCI journal article supplement (doi:10.1172/jci26031), 2005-08-01
Supplement: sd2 [file 2]

## Potential factors causing susceptibility to TSHR autoimmunity

### External factors

- Infection
- Trauma
- Stress
- Iodine intake
- Irradiation

### Internal factors

- Thyroid autoantibodies
- Sex steroids
- Pregnancy
- Fetal microchimerism

### Increased genetic susceptibility

- HLA class II genes with an arginine at position 74
- CTLA4*
- CD40*
- Tg*
- Unknown genes on a variety of confirmed loci

## Possible clinical indications for TSHR antibody assessment

### Graves disease

- Diagnosis
- Assessment of disease activity
- Prediction of remission after antithyroid drug administration

### Graves ophthalmopathy

- Detection of underlying autoimmunity
- Assessment of disease activity

### Hypothyroidism

- Diagnosis of atrophic Hashimoto thyroiditis

### Pregnancy and neonatal thyroid dysfunction<sup>A</sup>

- Prediction of neonatal Graves disease
- Diagnosis of transient hyper- and hypothyroidism in the newborn

### Toxic multinodular goiter

- Diagnosis of coexisting Graves disease

---

<sup>A</sup>The function of persistent TSHR antibodies in pregnancy should be determined using a bioassay.
